# Supplementary material
Source: publisher site journal article supplement (https://www.dovepress.com/article/supplementary_file/519385/519385-Revised-Supplementary-Tables-1-3.docx)
Supplement: Supplementary file 1 [file 519385-Revised-Supplementary-Tables-1-3.docx]

**Supplemental Table 1: Raw data**

| **Supplemental Table 1.** Epidemiologic Data, Type and Course of the Disease, and Follow-Up | | | | | | | |
| --- | --- | --- | --- | --- | --- | --- | --- |
| Number | Sex | Age at first visit | Age at onset of pustular psoriasis | PP presentation  at first visit | Current clinical  status | Prognosis | Follow-up, years |
| 1 | Female | 1.9 years | 1.9 years | PEP | PV | N | 4 |
| 2 | Male | 1 year | 9 months | GPP | Lesion-free | R | 3 |
| 3 | Male | 3 months | 2 months | APP | Lesion-free | R | 7 |
| 4 | Male | 11 months | 2 months | GPP | PVP | N | 7 |
| 5 | Female | 2.9 years | 2.6 years | APP | Lesion-free | R | 3 |
| 6 | Male | 10.3 years | 10.2 years | GPP | Lesion-free | R | 7 |
| 7 | Female | 4.5 years | 4.3 years | GPP | PVP, joint pain | N | 2 |
| 8 | Female | 5 years | 5 years | GPP | L | L | 5 |
| 9 | Male | 8 years | 7.9 years | GPP | Nail lesions, joint pain | R | 6 |
| 10 | Male | 6.5 years | 6.4 years | PEP | Lesion-free | R | 5 |
| 11 | Male | 7.5 years | 10 days | PEP | PV | N | 6 |
| 12 | Female | 8.5 years | 8.4 years | GPP | Lesion-free | R | 7 |
| 13 | Male | 6 months | 4 months | GPP | Lesion-free | R | 5 |
| 14 | Male | 7.3 years | 5 months | GPP | Nail lesions | N | 4 |
| 15 | Female | 3.8 years | 3.5 years | GPP | Lesion-free | N | 3 |
| 16 | Male | 9.1 years | 8.3 years | GPP | Nail lesions | R | 4 |
| 17 | Male | 8.8 years | 8.6 years | GPP | Joint pain | R | 2 |
| 18 | Female | 5 months | 4 months | PEP | L | L | 2 |
| 19 | Male | 7 months | 6 months | GPP | Lesion-free | R | 7 |
| 20 | Male | 15.3 years | 3 months | GPP, PsA | L | L | 6 |
| 21 | Female | 9.9 years | 9.8 years | GPP | Lesion-free | N | 4 |
| 22 | Male | 9.3 years | 9.3 years | PEP | Nail lesions | N | 4 |
| 23 | Male | 2.7 years | 2.5 years | GPP | Lesion-free | R | 7 |
| 24 | Female | 4 months | 3.5 months | PEP | Lesion-free | R | 11 |
| 25 | Male | 4.5 years | 4.4 years | GPP | L | L | 3 |
| 26 | Male | 3.9 years | 3.9 years | PVP | Lesion-free | N | 4 |
| 27 | Female | 6.6 years | 6.5 years | GPP | Nail lesions | R | 5 |
| 28 | Female | 5.3 years | 4.2 years | PEP | Lesion-free | R | 4 |
| 29 | Male | 3.7 years | 3.6 years | GPP | Lesion-free | R | 2 |
| 30 | Female | 4.0 years | 3.8 years | GPP | L | L | 3 |
| 31 | Male | 10 months | 10 months | PVP | Lesion-free | R | 2 |
| 32 | Male | 1.2 years | 2 months | PEP | Lesion-free | R | 4 |
| 33 | Male | 1 months | 15 days | GPP | Nail lesions | N | 5 |
| 34 | Female | 5 months | 5 months | APP | PVP | N | 4 |
| 35 | Female | 3 months | 3 months | GPP | Lesion-free | R | 7 |
| 36 | Male | 5.4 years | 5.4 years | GPP | Nail lesions | R | 6 |
| 37 | Male | 4 months | 4 months | APP | PV, joint pain | N | 7 |
| 38 | Female | 9.3 years | 9.1 years | APP | Lesion-free | R | 4 |
| 39 | Male | 2 months | 1.8 years | GPP | L | L | 4 |
| 40 | Male | 3.4 years | 20 days | GPP | Lesion-free | N | 10 |
| 41 | Female | 4.4 years | 2.5 years | GPP | L | L | 4 |

R: remission; N: non-remission; L: lost to follow-up.

| **Supplemental Table 2: Raw data**  **Supplemental Table 2.** Treatment of pustular psoriasis | | |
| --- | --- | --- |
| Number | Initial treatment | Current treatment |
| 1 | Acitretin | Topical |
| 2 | Acitretin, IVIG | None |
| 3 | Acitretin | None |
| 4 | Acitretin | Topical |
| 5 | Acitretin | None |
| 6 | Acitretin | None |
| 7 | Biological | Topical, biologics |
| 8 | Acitretin, ciclosporin, methylprednisolone, IVIG | N/A |
| 9 | Acitretin, ciclosporin | Biologics |
| 10 | Acitretin | None |
| 11 | Acitretin | None |
| 12 | Acitretin, methylprednisolone | None |
| 13 | Acitretin, methylprednisolone, IVIG | None |
| 14 | Acitretin | Biologics |
| 15 | Acitretin | Acitretin, biologics, topical |
| 16 | Acitretin, ciclosporin, methylprednisolone | None |
| 17 | Acitretin | Biologics |
| 18 | IVIG | N/A |
| 19 | Acitretin | None |
| 20 | Acitretin, ciclosporin, IVIG | N/A |
| 21 | Acitretin | Topical |
| 22 | Acitretin | Topical |
| 23 | Acitretin | None |
| 24 | Acitretin, IVIG | Topical |
| 25 | Acitretin, ciclosporin, IVIG | N/A |
| 26 | Acitretin, IVIG | Biologics |
| 27 | Acitretin | None |
| 28 | Acitretin, methylprednisolone | None |
| 29 | Acitretin, IVIG | None |
| 30 | Acitretin | N/A |
| 31 | IVIG | None |
| 32 | Acitretin, IVIG | Acitretin |
| 33 | Acitretin, IVIG | Biologics |
| 34 | Acitretin, IVIG | Topical |
| 35 | Acitretin, IVIG | None |
| 36 | Acitretin, IVIG, ciclosporin | None |
| 37 | Acitretin | Topical, biologics |
| 38 | Acitretin | None |
| 39 | Acitretin | N/A |
| 40 | Acitretin, methylprednisolone, IVIG | Biologics |
| 41 | Acitretin, prednisone | N/A |

N/A: not available

**Supplemental Table 3: Additional data analysis**

**Supplemental Table3.** Sensitive analysis.

| Prognosis | Acitretin group  N=19 | Combination group  N=19 | P |
| --- | --- | --- | --- |
| **Conservative** |  |  | 1.000 |
| Remission | 11 (57.9) | 11 (57.9) |  |
| Non-remission | 8 (42.1) | 8 (42.1) |  |
| **Optimistic** |  |  | 0.091 |
| Remission | 9 (47.4) | 15 (78.9) |  |
| Non-remission | 10 (52.6) | 4 (21.1) |  |

Data were presented as count (percentage).
